# Supplementary material for: The necroptosis-related signature and tumor microenvironment immune characteristics associated with clinical prognosis and drug sensitivity analysis in stomach adenocarcinoma
Source: publisher site journal article supplement (doi:10.18632/aging.205690), 2024-03-27
Supplement: Supplementary file [file aging-v16i7-205690-supplementary-material-SD1.pdf]

## SUPPLEMENTARY FIGURES

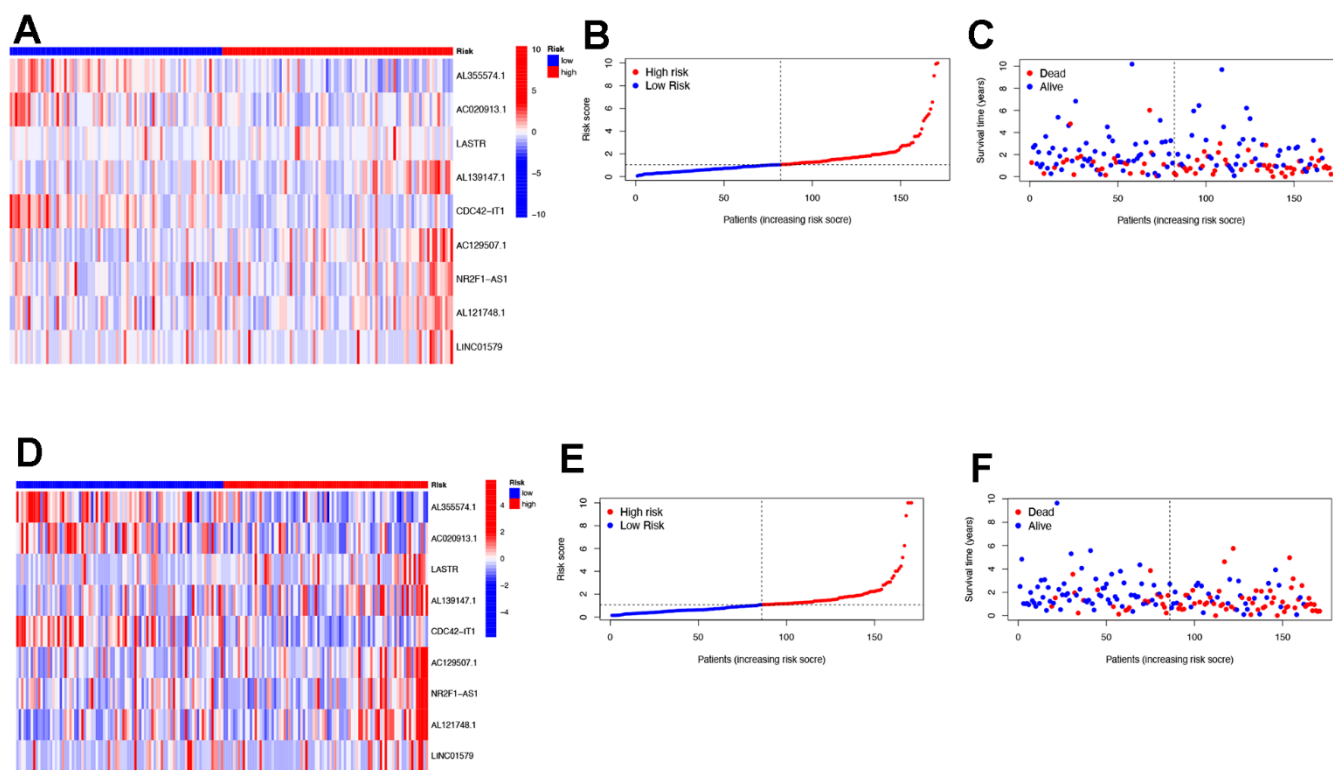

**Supplementary Figure 1.** (A) The heat map of 9 lncRNAs expression in the test. (B) Exhibition of necroptosis-related lncRNAs model based on risk score of the test. (C) Survival time and survival status between low- and high-risk groups in the test. (D) The heat map of 9 lncRNAs expression in the train. (E) Exhibition of necroptosis-related lncRNAs model based on risk score of the train. (F) Survival time and survival status between low- and high-risk groups in the train.

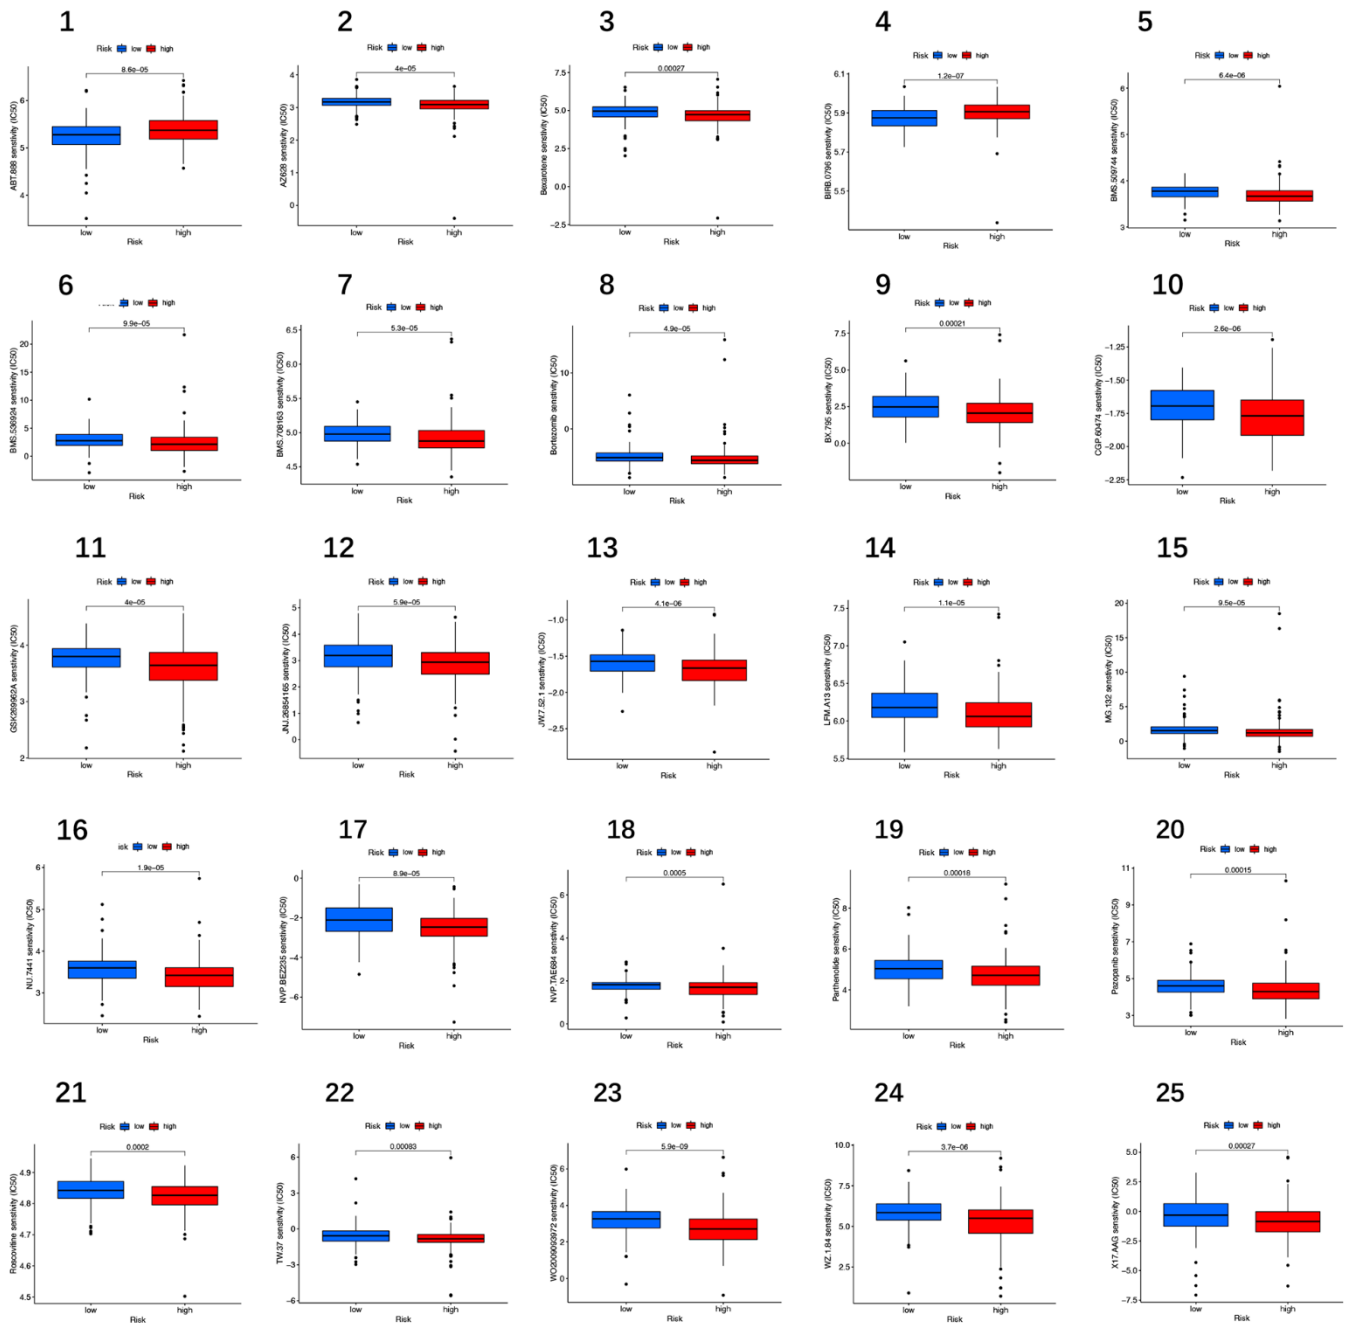

**Supplementary Figure 2.** (1–25) 25 immunotherapeutic drugs showed a significant IC<sub>50</sub> difference in different risk groups (all p<0.05).

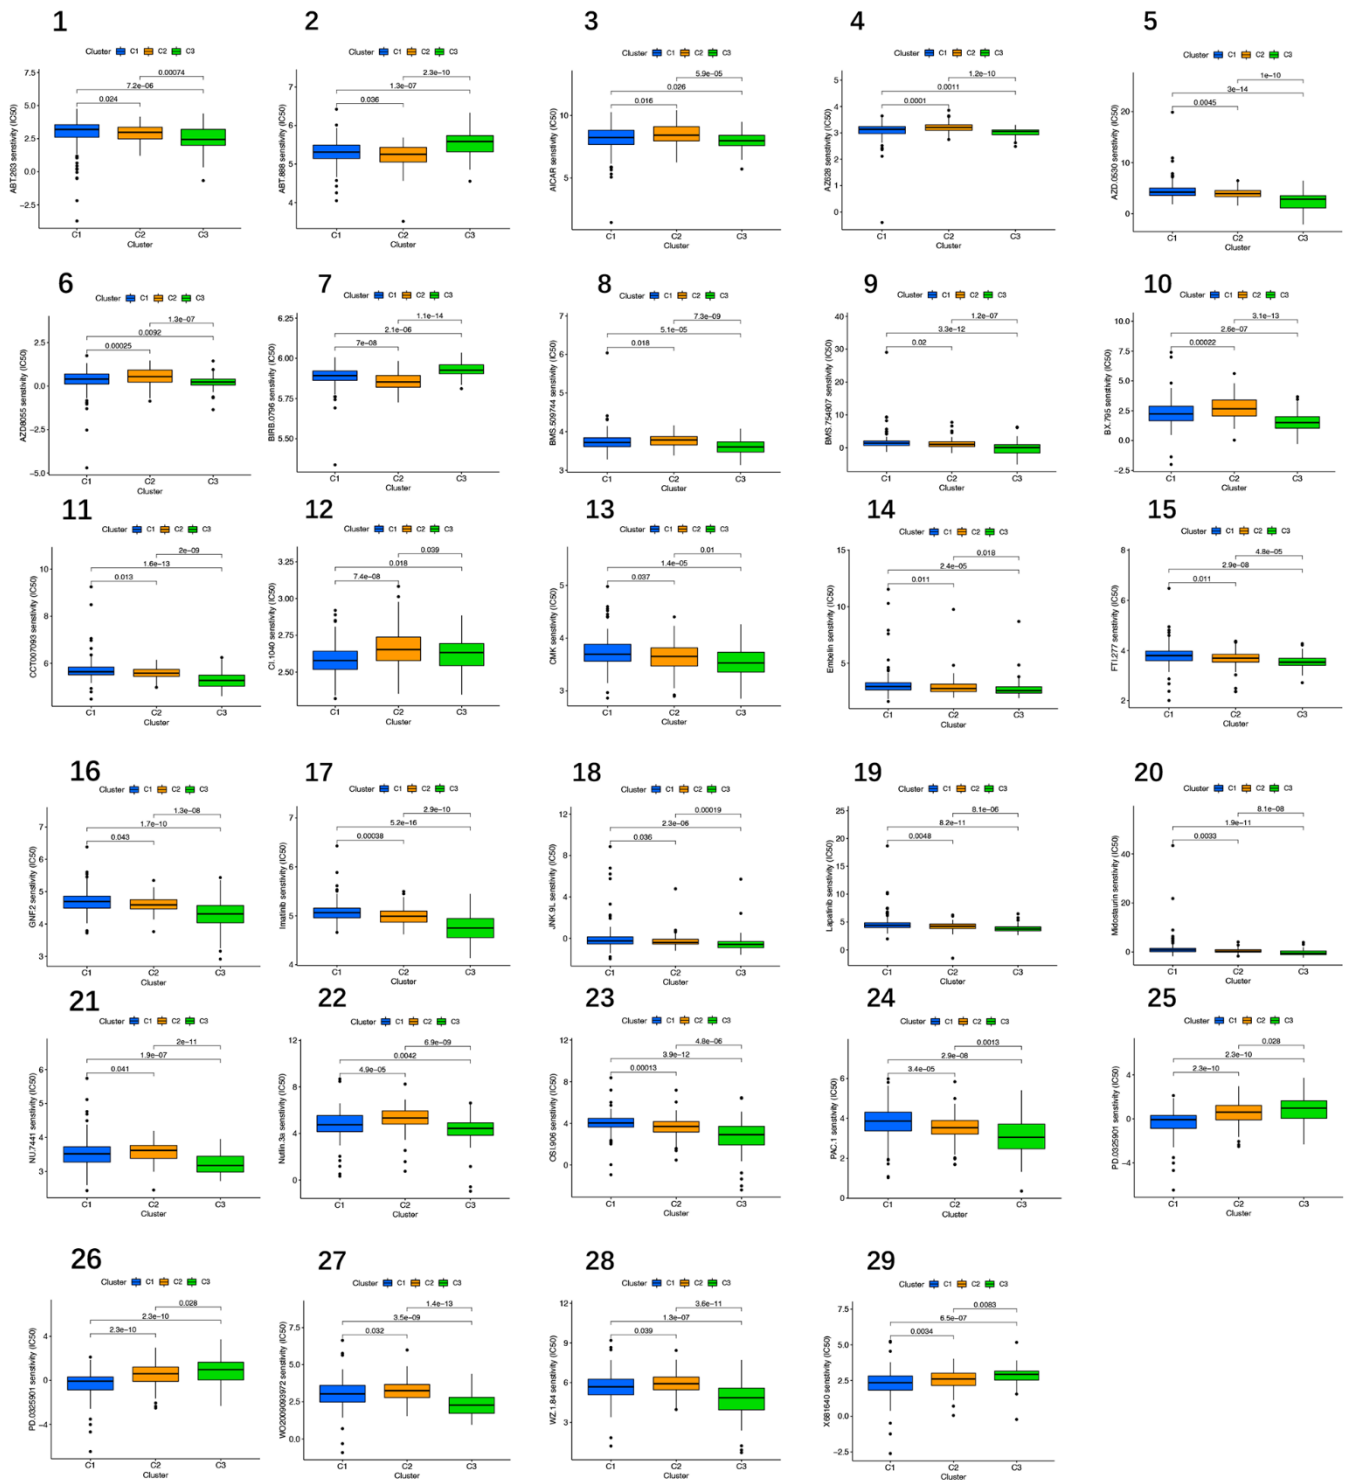

Supplementary Figure 3. (1–29) 29 immunotherapeutic drugs showed a significant  $IC_{50}$  difference in different clusters (all  $p < 0.05$ ).
