# Supplementary material for: The necroptosis-related signature and tumor microenvironment immune characteristics associated with clinical prognosis and drug sensitivity analysis in stomach adenocarcinoma
Source: publisher site journal article supplement (doi:10.18632/aging.205690), 2024-03-27
Supplement: Supplementary file [file aging-v16i7-205690-supplementary-material-SD2.pdf]

## SUPPLEMENTARY TABLES

**Supplementary Table 1. The 67 necroptosis-related genes.**

|        |        |         |          |          |          |
|--------|--------|---------|----------|----------|----------|
| FADD   | TRAF2  | SIRT2   | CD40     | MYC      | IPMK     |
| FAS    | PANX1  | SIRT1   | BCL2L11  | BCL2     | ID1      |
| FASLG  | OTULIN | PLK1    | EGFR     | HDAC9    | IDH1     |
| MLKL   | CYLD   | MPG     | DDX58    | SIRT3    | TNFRSF1A |
| RIPK1  | USP22  | BACH2   | TARDBP   | HSPA4    | MAPK8    |
| RIPK3  | MAP3K7 | GATA3   | APP      | KLF9     | AXL      |
| TLR3   | SQSTM1 | MYCN    | TNFRSF21 | HSP90AA1 | RNF31    |
| TNF    | STAT3  | ALK     | TNFRSF1B | ITPK1    | LEF1     |
| TSC1   | DIABLO | ATRX    | HAT1     | CDKN2A   | ZBP1     |
| TRIM11 | DNMT1  | TERT    | BNIP3    | IDH2     | BRAF     |
| CASP8  | CFLAR  | SLC39A7 | TNFSF10  | STUB1    | SPATA2   |
| FLT3   |        |         |          |          |          |

**Supplementary Table 2. The primers used in the study.**

| Gene name  | Forward primer (5'→3') | Reverse primer (5'→3')  |
|------------|------------------------|-------------------------|
| AL355574.1 | GGAGGGCAGAGAGCAACGTA   | CGCCTCTACAGACAGCACTC    |
| AC020913.1 | GAATGGCAAAGCACTTGGGG   | AGCTCTCCTTGCAGGTAGGT    |
| LASTR      | AGTGGGTGAAGTCCTGGTT    | GGCTGAAGGGTTTAGATG      |
| AL139147.1 | CACAGCCAAAACCAAACCTCCT | TGGGTTGCCATTCACTGACT    |
| CDC42-IT1  | GCCGGAGAACGAATGTGATG   | TCTTTTTGTTTACCGGAGTTCCA |
| AC129507.1 | GGACAGATGGTGGGAGAGGAA  | ATGCTGACGAGGTTTGGAGAATC |
| NR2F1-AS1  | GCCCATGATGAACCTGTTTT   | TTACATCACGGCATGGTAGC    |
| AL121748.1 | AACAAGGCACAAAAGGGGAAAA | AGCAAACGCAAGGCGAAGG     |
| LINC01579  | TCCCAGTGAAGAGAGAGCGA   | CTAAGTTCCACGTCACGGCT    |
| GAPDH      | AATGGGCAGCCGTTAGGAAA   | GCCCAATACGACCAAATCAGAG  |
